# Supplementary material for: Heath-related quality of life in Spanish breast cancer patients: a systematic review
Source: Springer Nature journal article supplement (doi:10.1186/1477-7525-9-3), 2011-01-14

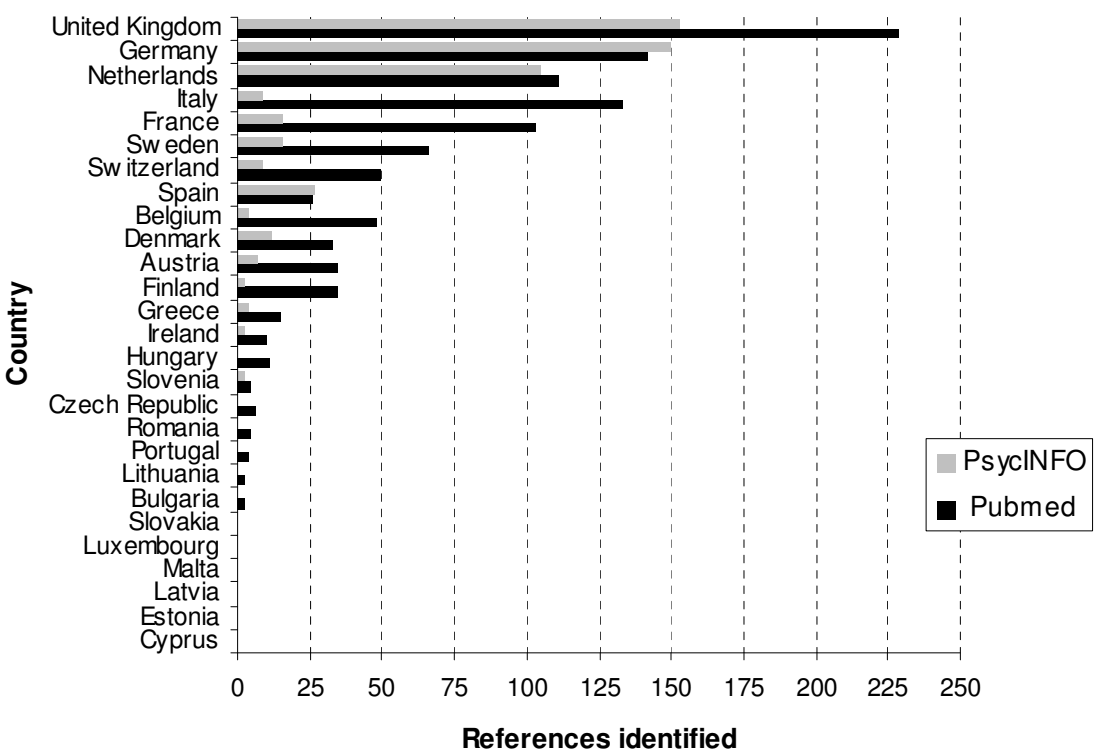

Supplement: 12955_2010_777_MOESM2_ESM.pdf [file 12955_2010_777_MOESM2_ESM.pdf]
