# Supplementary material for: Heath-related quality of life in Spanish breast cancer patients: a systematic review
Source: Springer Nature journal article supplement (doi:10.1186/1477-7525-9-3), 2011-01-14
Supplement: 12955_2010_777_MOESM3_ESM.pdf [file 12955_2010_777_MOESM3_ESM.pdf]

|              |                |
|--------------|----------------|
| PubMed       | n = 26         |
| PsycINFO     | n = 27         |
| Dialnet      | n = 38         |
| EMBASE       | n = 18         |
| IBECs        | n = 6          |
| CUIDEN       | n = 5          |
| ISOC         | n = 2          |
| LILACS       | n = 0          |
| <b>Total</b> | <b>n = 122</b> |

**Papers for review of title and abstract**  
**133**

Manual search n = 11

**Papers excluded:**

- duplicates n = 25
- inclusion criteria not met n = 63

**Papers for review of full text**  
**45**

**Articles excluded:**

- no HRQL-specific results n = 5
- no breakdown of results by tumor type n = 6
- no breakdown of results by country of origin n = 2
- no HRQL-specific questionnaire used n = 4
- study with non-Spanish patients n = 1
- HRQL not measured n = 2

**Studies included**  
**25**
